# Supplementary material for: Non-thermal polyimidization reaction using base–ionic liquid medium as a dual catalyst–solvent
Source: Royal Society of Chemistry journal article supplement (doi:10.1039/c6ra23162d), 2016-01-01
Supplement: c6ra23162d1.pdf [file c6ra23162d1.pdf]

## Supporting information

### **Non-thermal polyimidization reaction using base-ionic liquid medium as a dual catalyst-solvent**

Ming Chen<sup>\*ab</sup>, Shuanglong Wang<sup>c</sup>

<sup>a</sup>*Pharmaceutical Institute, University of Bonn, Brühler Straße 7, Bonn 53119, Germany. E-mail: [mingchen@uni-bonn.de](mailto:mingchen@uni-bonn.de).*

<sup>b</sup>*Shanghai MedIonChem. Co. Ltd., Jiang Pu Street 740-7, Shanghai 200082, People's Republic of China. E-mail: [mingchen@mail.ecust.edu.cn](mailto:mingchen@mail.ecust.edu.cn).*

<sup>c</sup>*CNRS-UPPA, Laboratoire de Chimie Analytique Bio-inorganique et Environnement, UMR5254, Hélioparc, 2, Av. Angot, 64053 Pau, France. E-mail: [jiayou2710@gmail.com](mailto:jiayou2710@gmail.com).*

\* Corresponding author.

## Materials

**Table S1** Chemicals and reagents

| Reagent                                                | Supplier                    | Purity  |
|--------------------------------------------------------|-----------------------------|---------|
| PMDA                                                   | Boshan Hengtai Chem.        | 98%     |
| ODA                                                    | Guansen Insulation Products | ≥ 99.5% |
| IL                                                     |                             |         |
| [C <sub>2</sub> mim][OAc]                              | BASF                        | ≥ 95%   |
| [C <sub>4</sub> mim][OAc]                              | BASF                        | ≥ 95%   |
| [C <sub>4</sub> mim][PF <sub>6</sub> ]                 | Shanghai Chenjie Chem.      | ≥ 99%   |
| [C <sub>4</sub> mim][BF <sub>4</sub> ]                 | Shanghai Chenjie Chem.      | ≥ 99%   |
| [C <sub>2</sub> mim][Et <sub>2</sub> PO <sub>4</sub> ] | Sigma-Aldrich (China)       | ≥ 98%   |
| [Cho][C <sub>2</sub> H <sub>5</sub> CO <sub>2</sub> ]  | Sigma-Aldrich (China)       | ≥ 96%   |
| Base                                                   |                             |         |
| DIPEA                                                  | Shanghai Ziyue Chem. Eng.   | 99.9%   |
| pyridine                                               | Sigma-Aldrich (China)       | 99.8%   |
| KOtBu                                                  | Energy Chem.                | 98%     |
| DABCO                                                  | Sigma-Aldrich (China)       | ≥99%    |

## General Procedures

All reagents were lyophilized overnight before use. 1 equivalent PMDA (3.00 mol% mol/L) and 1 equivalent ODA (3.00 mol%) were dissolved in IL and stirred under argon protection at room temperature. Base was added subsequently into the solution. The crude product was filtered out, washed 5 times by water or methanol and then dried in an air oven for 4 hours.

All the reactions were first performed with fresh base-IL medium so as to reach the saturation of product. The yields then were determined in the reuse of the “old” medium.

## Methods

Determination of molar mass was performed on a matrix-assisted laser desorption/ionization time-of-flight (MALDI-TOF) Autoflex III mass spectrometer (Bruker) in linear, positive ion mode with  $\alpha$ -cyano-4-hydroxycinnamic acid as matrix. Samples for the mass spectrometry were prepared by dissolving the product (0.10 mg) in DMAc (5.0 mL) at 40°C and then adding 100  $\mu$ L of this solution to a water/acetonitrile mixture (50:50, 900  $\mu$ L). The resulting sample was filtered through a 0.02  $\mu$ m PTFE membrane and injected at a flow rate of 5  $\mu$ L/min.

Fourier transform infrared (FT-IR) spectra were measured by using a Vertex 70 FT-IR spectrometer (Bruker).

Gel permeation chromatographic (GPC) analysis was performed on an Agilent PL GPC 220 instrument equipped with a Waters 2414 detector and 2 PolarGel-M 10 $\mu$ m columns. All GPC analyses were performed using a DMF solution at a flow rate of 1.0 mL/min at 60 °C and calibrated with polystyrene standards. Samples for GPC analysis were prepared by dissolving the product (0.1 mg) in DMAc with 0.1% LiBr (5.0 mL) at 40°C and filtered through a 0.02  $\mu$ m PTFE membrane prior to injection.

T<sub>g</sub> was measured by using a DSC instrument (Pyris 6, Perkin Elmer). Sample weighed 10.0 mg and the analysis was carried out at a 10 °C/min heating rate under nitrogen purge (25 mL/min). Temperature and heat flow were calibrated using indium and zinc standards.

A TGA instrument (Pyris 6, Perkin Elmer) was used to evaluate the thermal stability of the polyimides. The analysis was carried out at a 10 °C/min heating rate under nitrogen purge (25 mL/min). The weight loss signal was detected as a function of time and temperature.

**Table S2**

| Entry | IL                                                     | Base (mol%)     | T (°C) | <i>M<sub>n</sub></i> (kDa) | <i>M<sub>w</sub></i> / <i>M<sub>n</sub></i> | Yield <sup>a</sup> /Time |
|-------|--------------------------------------------------------|-----------------|--------|----------------------------|---------------------------------------------|--------------------------|
| S1    | [C <sub>2</sub> mim][OAc]                              | -               | r.t.   | 14.2                       | 1.46                                        | Fig. S4                  |
| S2    | [C <sub>4</sub> mim][OAc]                              | -               | r.t.   | 12.5                       | 1.61                                        | Fig. S4                  |
| S3    | [C <sub>4</sub> mim][PF <sub>6</sub> ]                 | -               | r.t.   | -                          | -                                           | 0                        |
| S4    | [C <sub>4</sub> mim][BF <sub>4</sub> ]                 | -               | r.t.   | -                          | -                                           | 0                        |
| S5    | [C <sub>2</sub> mim][Et <sub>2</sub> PO <sub>4</sub> ] | -               | r.t.   | -                          | -                                           | 0                        |
| S6    | [Cho][C <sub>2</sub> H <sub>5</sub> CO <sub>2</sub> ]  | -               | r.t.   | -                          | -                                           | 0                        |
| S7    | [C <sub>2</sub> mim][OAc]                              | -               | 80     | 34.1                       | 2.42                                        | Fig. S5                  |
| S8    | [C <sub>4</sub> mim][OAc]                              | -               | 80     | 32.4                       | 2.24                                        | Fig. S5                  |
| S9    | [C <sub>4</sub> mim][PF <sub>6</sub> ]                 | -               | 80     | 5.7                        | 2.09                                        | Fig. S5                  |
| S10   | [C <sub>4</sub> mim][BF <sub>4</sub> ]                 | -               | 80     | 11.4                       | 2.71                                        | Fig. S5                  |
| S11   | [C <sub>2</sub> mim][Et <sub>2</sub> PO <sub>4</sub> ] | -               | 80     | 16.1                       | 2.23                                        | Fig. S5                  |
| S12   | [Cho][C <sub>2</sub> H <sub>5</sub> CO <sub>2</sub> ]  | -               | 80     | -                          | -                                           | 0                        |
| S13   | DMAc                                                   | DIPEA (3.00)    | r.t.   | -                          | -                                           | 0                        |
| S14   | DMAc                                                   | DIPEA (6.00)    | r.t.   | -                          | -                                           | 0                        |
| S15   | DMAc                                                   | DIPEA (7.50)    | r.t.   | -                          | -                                           | 0                        |
| S16   | DMAc                                                   | Pyridine (3.00) | r.t.   | -                          | -                                           | 0                        |
| S17   | DMAc                                                   | Pyridine (6.00) | r.t.   | -                          | -                                           | 0                        |
| S18   | DMAc                                                   | Pyridine (7.50) | r.t.   | -                          | -                                           | 0                        |
| S19   | DMAc                                                   | KOtBu (3.00)    | r.t.   | -                          | -                                           | 0                        |
| S20   | DMAc                                                   | KOtBu (6.00)    | r.t.   | -                          | -                                           | 0                        |
| S21   | DMAc                                                   | KOtBu (7.50)    | r.t.   | -                          | -                                           | 0                        |
| S22   | DMAc                                                   | DABCO (3.00)    | r.t.   | -                          | -                                           | 0                        |

|            |                           |                  |      |              |              |                  |
|------------|---------------------------|------------------|------|--------------|--------------|------------------|
| <b>S23</b> | DMAc                      | DABCO (6.00)     | r.t. | -            | -            | 0                |
| <b>S24</b> | DMAc                      | DABCO (7.50)     | r.t. | -            | -            | 0                |
| <b>S11</b> | [C <sub>2</sub> mim][OAc] | DIPEA (0.15)     | r.t. | -            | -            | 0                |
| <b>S12</b> | [C <sub>2</sub> mim][OAc] | DIPEA (0.75)     | r.t. | 14.5         | 1.60         | Fig. S6          |
| <b>S13</b> | [C <sub>2</sub> mim][OAc] | DIPEA (1.50)     | r.t. | 15.4         | 1.52         | Fig. S6          |
| <b>S14</b> | [C <sub>2</sub> mim][OAc] | DIPEA (3.00)     | r.t. | 18.7         | 1.55         | Fig. S6          |
| <b>S15</b> | [C <sub>2</sub> mim][OAc] | DIPEA (4.50)     | r.t. | 32.6         | 1.70         | Fig. S6          |
| <b>S16</b> | [C <sub>2</sub> mim][OAc] | DIPEA (6.00)     | r.t. | 30.1         | 1.61         | Fig. S6          |
| <b>S17</b> | [C <sub>2</sub> mim][OAc] | DIPEA (7.50)     | r.t. | 32.4         | 1.84         | Fig. S6          |
| <b>S18</b> | [C <sub>2</sub> mim][OAc] | DIPEA (30.00)    | r.t. | <sup>b</sup> | <sup>b</sup> | -                |
| <b>S19</b> | [C <sub>2</sub> mim][OAc] | Pyridine (0.15)  | r.t. | -            | -            | 0                |
| <b>S20</b> | [C <sub>2</sub> mim][OAc] | Pyridine (0.75)  | r.t. | -            | -            | 0                |
| <b>S21</b> | [C <sub>2</sub> mim][OAc] | Pyridine (1.50)  | r.t. | -            | -            | 0 <sup>b,c</sup> |
| <b>S22</b> | [C <sub>2</sub> mim][OAc] | Pyridine (3.00)  | r.t. | -            | -            | 0 <sup>b,c</sup> |
| <b>S23</b> | [C <sub>2</sub> mim][OAc] | Pyridine (4.50)  | r.t. | -            | -            | 0 <sup>b,c</sup> |
| <b>S24</b> | [C <sub>2</sub> mim][OAc] | Pyridine (6.00)  | r.t. | -            | -            | 0 <sup>b,c</sup> |
| <b>S25</b> | [C <sub>2</sub> mim][OAc] | Pyridine (7.50)  | r.t. | -            | -            | 0 <sup>b,c</sup> |
| <b>S26</b> | [C <sub>2</sub> mim][OAc] | Pyridine (30.00) | r.t. | -            | -            | 0 <sup>b,c</sup> |
| <b>S27</b> | [C <sub>2</sub> mim][OAc] | KOtBu (0.15)     | r.t. | 6.7          | 1.47         | Fig. S7          |
| <b>S28</b> | [C <sub>2</sub> mim][OAc] | KOtBu (0.75)     | r.t. | 21.4         | 1.71         | Fig. S7          |
| <b>S29</b> | [C <sub>2</sub> mim][OAc] | KOtBu (1.50)     | r.t. | 16.1         | 2.23         | Fig. S7          |
| <b>S30</b> | [C <sub>2</sub> mim][OAc] | KOtBu (3.00)     | r.t. | 10.7         | 2.41         | Fig. S7          |
| <b>S31</b> | [C <sub>2</sub> mim][OAc] | KOtBu (4.50)     | r.t. | 5.9          | 2.12         | Fig. S7          |
| <b>S32</b> | [C <sub>2</sub> mim][OAc] | KOtBu (6.00)     | r.t. | 4.4          | 2.22         | Fig. S7          |
| <b>S33</b> | [C <sub>2</sub> mim][OAc] | KOtBu (7.50)     | r.t. | 4.2          | 2.30         | Fig. S7          |
| <b>S34</b> | [C <sub>2</sub> mim][OAc] | KOtBu (30.00)    | r.t. | <sup>b</sup> | <sup>b</sup> | -                |
| <b>S35</b> | [C <sub>2</sub> mim][OAc] | DABCO (0.15)     | r.t. | -            | -            | 0                |
| <b>S36</b> | [C <sub>2</sub> mim][OAc] | DABCO (0.75)     | r.t. | -            | -            | 0 <sup>b,c</sup> |
| <b>S37</b> | [C <sub>2</sub> mim][OAc] | DABCO (1.50)     | r.t. | -            | -            | 0 <sup>b,c</sup> |
| <b>S38</b> | [C <sub>2</sub> mim][OAc] | DABCO (3.00)     | r.t. | -            | -            | 0 <sup>b,c</sup> |
| <b>S39</b> | [C <sub>2</sub> mim][OAc] | DABCO (4.50)     | r.t. | -            | -            | 0 <sup>b,c</sup> |
| <b>S40</b> | [C <sub>2</sub> mim][OAc] | DABCO (6.00)     | r.t. | -            | -            | 0 <sup>b,c</sup> |
| <b>S41</b> | [C <sub>2</sub> mim][OAc] | DABCO (7.50)     | r.t. | -            | -            | 0 <sup>b,c</sup> |
| <b>S42</b> | [C <sub>2</sub> mim][OAc] | DABCO (30.00)    | r.t. | -            | -            | 0 <sup>b,c</sup> |

<sup>a</sup> The isolated yield of product in first reuse of base-IL medium.

<sup>b</sup> The product was swollen or dissolved in base-IL medium.

<sup>c</sup> The IL-base medium darkened immediately.

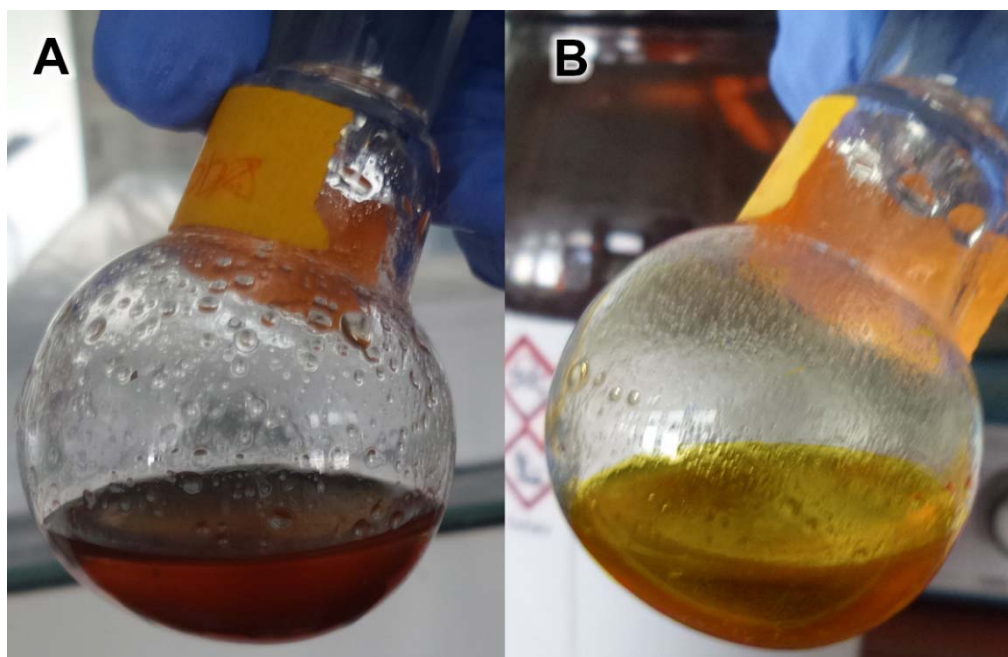

**Fig. S1** Observed appearance of the reaction mixtures after 30 minutes, when the PMDA-ODA synthesis reactions were started under the following conditions: (A) in the first use of pyridine (3.00 mol%)-[C<sub>2</sub>mim][OAc] medium, and (B) in the first use of DIPEA (3.00 mol%)-[C<sub>2</sub>mim][OAc] medium.

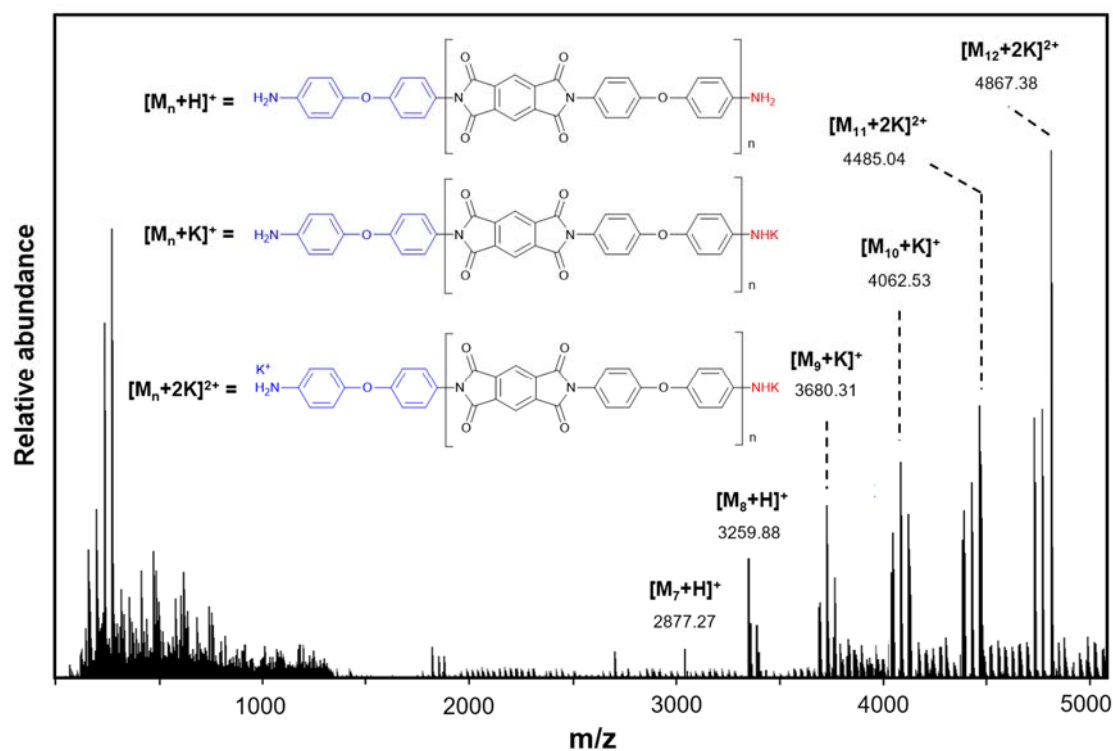

**Fig. S2** MALDI-TOF mass spectrum of PMDA-ODA polyimide synthesized from [C<sub>2</sub>mim][OAc].

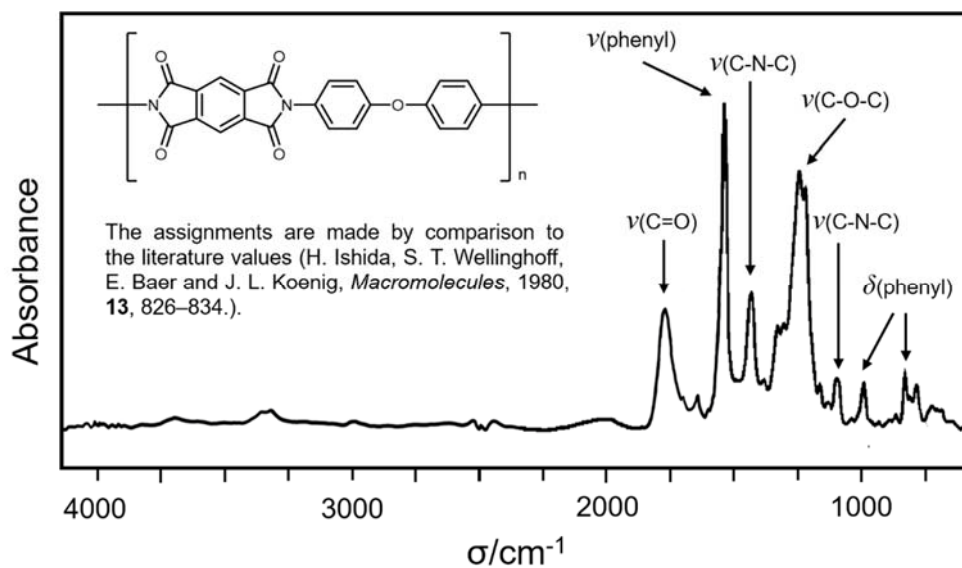

**Fig. S3** Infrared spectrum of PMDA-ODA polyimide synthesized in [C<sub>2</sub>mim][OAc] (film from DMAc).

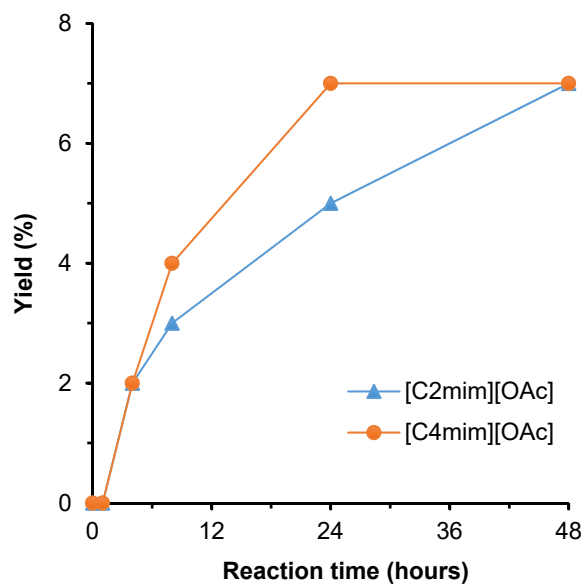

**Fig. S4** Yield vs. reaction time profile for the reaction of PMDA-ODA polyimide synthesis in neat ILs at room temperature.

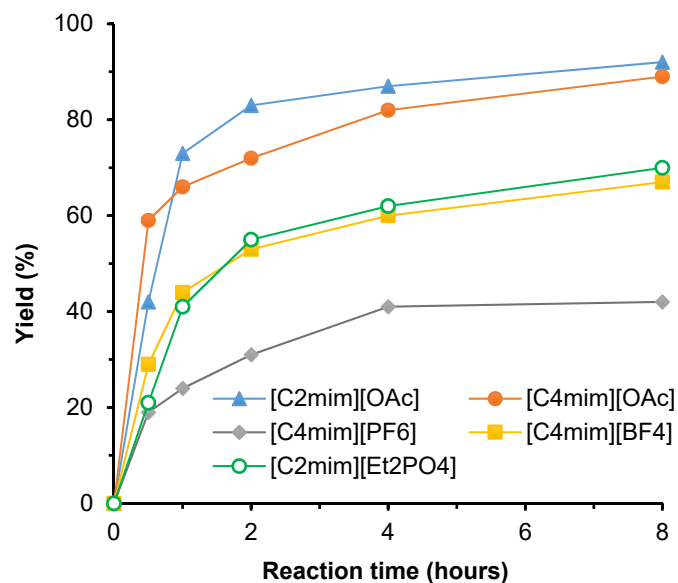

**Fig. S5** Yield vs. reaction time profile for the reaction of PMDA-ODA polyimide synthesis in neat ILs at 80°C.

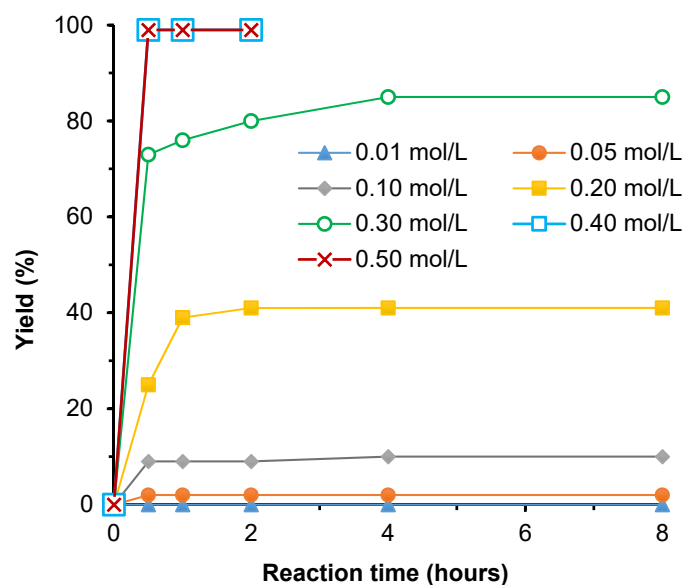

**Fig. S6** Yield vs. reaction time profile for the reaction of PMDA-ODA polyimide synthesis in IL containing various concentrations of DIPEA.

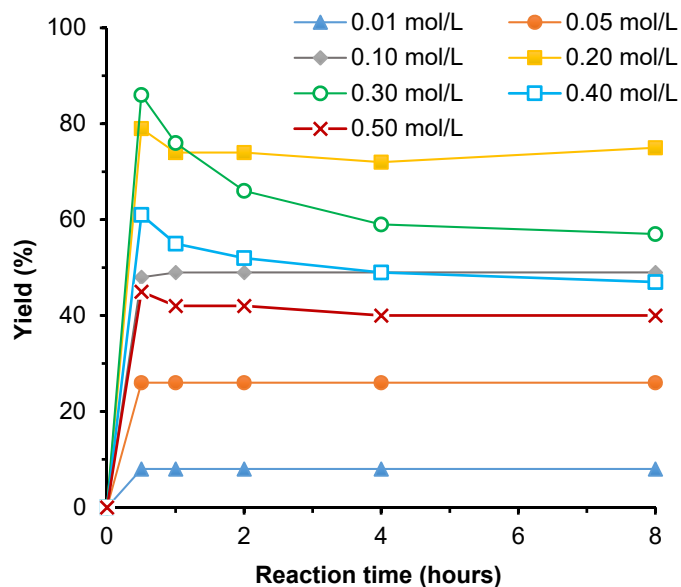

**Fig. S7** Yield vs. reaction time profile for the reaction of PMDA-ODA polyimide synthesis in IL containing various concentrations of KOTBu.

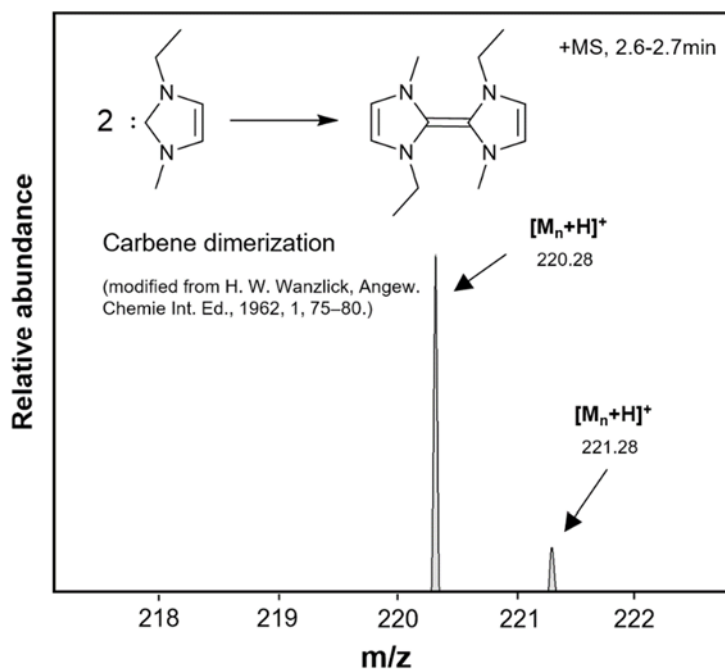

**Fig. S8** MALDI-TOF mass spectrum of a separated peak, which appears corresponding to the mass of the carbene dimer.



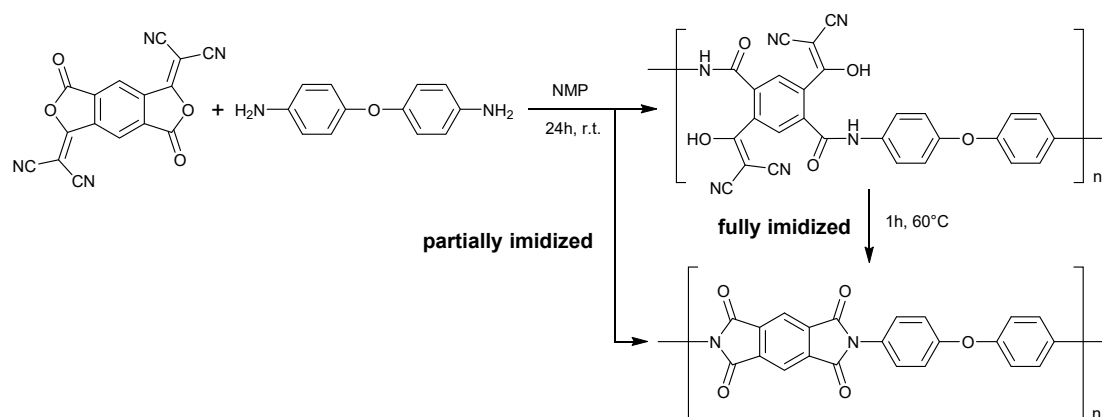

**Scheme S1** Synthesis of PMDA-ODA polyimide by using dicyanomethylidene derivative of PMDA.
